# Supplementary material for: Dietary Astaxanthin Can Promote the Growth and Motivate Lipid Metabolism by Improving Antioxidant Properties for Swimming Crab, Portunus trituberculatus
Source: MDPI journal article supplement (doi:10.3390/antiox13050522), 2024-04-26
Supplement: s1 [file s1]

**Table S1.** Primer pairs sequences used for real-time quantitative PCR.

| Gene                       | Nucleotide sequence (from 5' to 3')                   | Product size (bp) | Accession no.  |
|----------------------------|-------------------------------------------------------|-------------------|----------------|
| <i>cMnsod</i> <sup>1</sup> | F: GATCCATCACACCAAGCACC<br>R: GTTCTCCTCCAGCTTCAGGT    | 193               | FJ031018.1     |
| <i>cat</i> <sup>2</sup>    | F: GCTCTGACCCTGACTATGCT<br>R: CGACCAACAGGAATTAGCGG    | 180               | FJ152102.2     |
| <i>gsh-px</i> <sup>3</sup> | F: TACCGTTCAGCAAGTACCGT<br>R: GTGGTGTTTTCTGGTGACC     | 171               | KY216076.1     |
| <i>trx</i> <sup>4</sup>    | F: GAAAGGGCGAGAAGGTCCA<br>R: CTACTCCCCAATGAGCCGAT     | 188               | OP081649       |
| <i>tlr</i> <sup>5</sup>    | F: ACTTTTGTGTTGTGCTGCGG<br>R: CACCCTCACTCTATGCCCTT    | 126               | MF124331.1     |
| <i>relish</i> <sup>6</sup> | F: GTGAGTTGAAAATAGTGCGGA<br>R: ATTGGTAACTCTGTAGCGTGG  | 227               | MF624027.1     |
| <i>irak</i> <sup>7</sup>   | F: CCCACACTGCCACTCTCATC<br>R: TCAGAAGGTTTCAGCCTCACTC  | 217               | AFZ95002.1     |
| <i>myd88</i> <sup>8</sup>  | F: TGCCACTCCCTGGATTACTAT<br>R: AGCCAGAGAGTTCCCGTATTC  | 133               | KM521426.2     |
| <i>hsp70</i> <sup>9</sup>  | F: CGTGCAGTAGGCATCGATCT<br>R: GTGTCTGTGAAGGCCACGTA    | 128               | XM_045252351.1 |
| <i>hsp90</i> <sup>10</sup> | F: TGCTGGCCGTATCTACAGAATG<br>R: GCGGGAAGTGTCTCTTCAT   | 127               | XM_045250701.1 |
| <i>po</i> <sup>11</sup>    | F: TTTGCCGAGACAAGCAGTGTG<br>R: TAGGCAGGCGCAGATGTCTC   | 139               | XM_045278589.1 |
| <i>ampk</i> <sup>12</sup>  | F: GCTGATGCCAGTGCCATGTA<br>R: AATGCCAAGATGAGGTGCAAT   | 150               | XM_045277426.1 |
| <i>foxo</i> <sup>13</sup>  | F: CATAAGTTCTCGCCAGCCTC<br>R: TAACCTTCAGGACACGGGAG    | 108               | XM_045253728.1 |
| <i>pi3k</i> <sup>14</sup>  | F: AGCCACCACTCGCTGAACA<br>R: GGGATGGGACTCTGCTGAAG     | 124               | ADE44090       |
| <i>akt</i> <sup>15</sup>   | F: GGACTACGAGGCACCAAGAA<br>R: TGGACCACTT-CATCACGCTC   | 179               | XM_045254065.1 |
| <i>nadph</i> <sup>16</sup> | F: CTACTATGCCAGTCGCCGTG<br>R: TGTGGCCCAAAGTTGATGGT    | 183               | XM_045258166.1 |
| <i>fabp1</i> <sup>17</sup> | F: CACTCGCCAGTAGTCAATAGG<br>R: TCACTTAGAGAGCAAAGGTCAC | 219               | KU950355       |
| <i>fabp3</i> <sup>18</sup> | F: GAAGGCACTTGGTGTTGGA                                | 119               | PRJNA432636    |

|                            |                           |     |                |
|----------------------------|---------------------------|-----|----------------|
|                            | R: TCTTGAGGGTGGAGATGGT    |     |                |
| <i>fatp4</i> <sup>19</sup> | F: AAGAATGACCCAATGCGTG    | 178 | PRJNA432636    |
|                            | R: GCCAGCGAAAGGTGTCTC     |     |                |
| <i>acox2</i> <sup>20</sup> | F: ACCAACCACGGCATTAC      | 116 | PRJNA432636    |
|                            | R: TTGTCCACCCCATTCAGC     |     |                |
| <i>gst</i> <sup>21</sup>   | F: CTCCTTGCCCTTGAGTGGAC   | 163 | XM_045273299.1 |
|                            | R: CTGTGCGGTGTGCTCCTTT    |     |                |
| <i>β-actin</i>             | F: CGAAACCTTCAACACTCCCG   | 155 | FJ641977.1     |
|                            | R: GGATAGCGTGAGGAAGGGCATA |     |                |
| <i>18s rRNA</i>            | F: CGCCTGTTTATCAAAAACAT   | 142 | XM_045249033.1 |
|                            | R: CCGGTCTGAACTCAGATCACG  |     |                |
| <i>gapdh</i> <sup>22</sup> | F: TGAGGTGAAGGTAGAGGAT    | 168 | XM_045278068.1 |
|                            | R: CCAGTGAAGTGAGCAGAG     |     |                |

---

<sup>1</sup> *cMnsod*, superoxide dismutase; <sup>2</sup> *cat*, catalase; <sup>3</sup> *gsh-px*, glutathione peroxidase; <sup>4</sup> *trx*, thioredoxin; <sup>5</sup> *tlr4*, toll like receptor 4; <sup>6</sup> *relish*, target of rapamycin; <sup>7</sup> *irak4*, interleukin 1 receptor associated kinase 4; <sup>8</sup> *myd88*, myeloid differentiation factor 88; <sup>9</sup> *hsp70*, heat shock protein 70; <sup>10</sup> *hsp90*, heat shock protein 90; <sup>11</sup> *po*, phenol oxidase; <sup>12</sup> *ampk*, Adenosine 5'-monophosphate (AMP)-activated protein kinase α2; <sup>13</sup> *foxo*, forkhead box protein O1; <sup>14</sup> *pi3k*, Phosphoinositide 3-kinase; <sup>15</sup> *akt*, protein kinase B; <sup>16</sup> *nadph*, nicotinamide adenine dinucleotide phosphate; <sup>17</sup> *fabp1*, fatty acid binding protein 1; <sup>18</sup> *fabp3*, fatty acid binding protein 3; <sup>19</sup> *fatp4*, fatty acid transport protein 4; <sup>20</sup> *acox2*, acyl-coenzyme a oxidase 2; <sup>21</sup> *gst*, Glutathione S-transferase; <sup>22</sup> *gapdh*, glyceraldehyde-3-phosphate dehydrogenase.
